# Supplementary material for: Validation of XCO 2 derived from SWIR spectra of GOSAT TANSO-FTS with aircraft measurement data
Source: Copernicus journal article supplement (doi:10.5194/acp-13-9771-2013), 2013-10-02
Supplement: Supplementary file 1 [file acp-13-9771-2013-supplement.pdf]

# Supplementary materials for “Validation of XCO<sub>2</sub> derived from SWIR spectra of GOSAT TANSO-FTS with aircraft measurement data”

Makoto Inoue, Isamu Morino, Osamu Uchino, Yuki Miyamoto, Yukio Yoshida, Tatsuya Yokota, Toshinobu Machida, Yousuke Sawa, Hidekazu Matsueda, Colm Sweeney, Pieter P. Tans, Arlyn E. Andrews, Sebastien C. Biraud, Tomoaki Tanaka, Shuji Kawakami, and Prabir K. Patra

## S-1. CAKs with respect to solar zenith angle

Figure S-1 shows examples of CAK for GOSAT XCO<sub>2</sub> at seven different solar zenith angles. It is found that the CAK is a function of solar zenith angle as mentioned in Sect. 3.1.4.

## S-2. Comparisons by curve fitting method

As discussed in Sect. 3.2, it was difficult to compare GOSAT XCO<sub>2</sub> with aircraft measurement data at some observation sites where there was a paucity of flight data on the day when GOSAT was scheduled to overpass. However, the temporal interpolation of aircraft-based XCO<sub>2</sub> by a curve fitting method enables temporally matched cases to be obtained for all observation sites of CONTRAIL, NOAA, DOE, and NIES (41 sites). Based on Miyamoto et al. (2013), we attempted to fit aircraft-based XCO<sub>2</sub> with the following equation (S.1) containing annual trend and annual / semiannual sinusoidal variations.

$$XCO_2(t) = Intercept + Trend \times t + \frac{Amp_1}{2} \times \cos\left(2\pi \frac{t-\Phi_1}{12}\right) + \frac{Amp_2}{2} \times \cos\left(4\pi \frac{t-\Phi_2}{12}\right) \quad (S.1)$$

where  $XCO_2(t)$  is the XCO<sub>2</sub> value at time  $t$ , *Intercept* denotes the column abundance on 1 January 2007 without sinusoidal variations, and *Trend* represents the monthly growth rate,  $Amp_1$  and  $Amp_2$  are sinusoidal variations with periods of one year and a half year, respectively, and  $\Phi_1$  and  $\Phi_2$  are phases in the annual and semiannual sinusoidal variations, respectively. We converted aircraft-based XCO<sub>2</sub> without CAK after 2007 into an XCO<sub>2</sub> time series (i.e. continuous data) by curve fitting. The GOSAT XCO<sub>2</sub> data observed within the  $\pm 2^\circ$  and  $\pm 5^\circ$  latitude/longitude boxes centered at each aircraft measurement site were compared with the calculated aircraft-based XCO<sub>2</sub> (i.e. estimates) in the GOSAT overpass time.

Before the validation, we focus on the uncertainties of aircraft-based XCO<sub>2</sub> arisen from the curve fitting. It is considered that there are significant interannual differences of CO<sub>2</sub> uptake during the Northern Hemisphere summer between 2009 and 2010 (e.g. Guerlet et al., 2013). Our estimation does not consider the interannual differences in

the seasonal uptake of CO<sub>2</sub>, so this may lead to an error source in this curve fitting approach. In this study, the uncertainties due to the curve fitting method are defined and calculated. We defined 1  $\sigma$  of the differences between “true aircraft-based XCO<sub>2</sub> values” and “the calculated values (i.e. estimates) in aircraft measurement time of the respective XCO<sub>2</sub> data by curve fitting” as uncertainties due to the curve fitting method. Table S-1 summarizes 1  $\sigma$  of the differences at each aircraft site. The uncertainties are about or less than 1 ppm, except two sites (SUR and BNE). In addition, Fig. S-2 shows the distance from each aircraft site to the GOSAT data obtained within  $\pm 5^\circ$  boxes of each site for all sites (i.e. absolute values of the latitude/longitude differences). We found that the matched data are distributed with uniformity in  $\pm 5^\circ$  boxes.

The results of the comparison for the  $\pm 2^\circ$  and  $\pm 5^\circ$  boxes centered at respective sites are shown in Figs. S-3 to S-16. In addition, the average and 1  $\sigma$  of the differences between GOSAT SWIR XCO<sub>2</sub> and aircraft-based XCO<sub>2</sub> at each aircraft site using curve fitting are listed in Tables S-2 and S-3 for land and ocean cases, respectively. For many observation sites at mid- and high-latitudes over the Northern Hemisphere, aircraft-based XCO<sub>2</sub> displayed a seasonal amplitude of approximately 7-8 ppm. In contrast, seasonal changes were obscure at Sydney (SYD) over the Southern Hemisphere. The growth rate of aircraft-based XCO<sub>2</sub> was about 2 ppm yr<sup>-1</sup> at most sites, which corresponded to previous studies of CO<sub>2</sub> variations. In most land regions, the GOSAT SWIR XCO<sub>2</sub> agreed with aircraft-based XCO<sub>2</sub>. There were also good correlations between both data sets over several ocean regions and the correlation coefficients were 0.92 and 0.61 with significance at the 99% level over Honolulu (HNL) and Manila (MNL), respectively, for the  $\pm 5^\circ$  boxes. Figure S-17 shows the scatter diagrams between GOSAT SWIR XCO<sub>2</sub> and aircraft-based XCO<sub>2</sub> (estimated values at the GOSAT overpass time) obtained by the curve fitting method at all observation sites. In land regions, the correlation coefficients were 0.81 with significance at the 99% level for both  $\pm 2^\circ$  and  $\pm 5^\circ$  boxes. Over ocean regions, the correlation coefficients were 0.72 and 0.75 with significance at the 99% level for  $\pm 2^\circ$  and  $\pm 5^\circ$  boxes, respectively. GOSAT data were negatively biased by about 1-2 ppm. These results were consistent with those of the direct comparison by temporally matched cases described in Sect. 4.3 (Table 4).

Thus, the curve fitting method is useful to validate the GOSAT products over all locations.

## References

- Guerlet, S., Basu, S., Butz, A., Krol, M., Hahne, P., Houweling, S., Hasekamp, O. P., and Aben, I.: Reduced carbon uptake during the 2010 Northern Hemisphere summer from GOSAT, *Geophys. Res. Lett.*, 40, 2378-2383, doi:10.1002/grl.50402, 2013.
- Miyamoto, Y., Inoue, M., Morino, I., Uchino, O., Yokota, T., Machida, T., Sawa, Y., Matsueda, H., Sweeney, C., Tans, P. P., Andrews, A. E., Biraud, S. C., and Patra, P. K.: Atmospheric column-averaged mole fractions of carbon dioxide at 53 aircraft measurement sites, *Atmos. Chem. Phys.*, 13, 5265-5275, doi:10.5194/acp-13-5265-2013, 2013.

Table S- 1: The 1 standard deviation ( $1 \sigma$ ) of the differences between the aircraft-based XCO<sub>2</sub> values and the fitted values (estimates) of the respective aircraft-based XCO<sub>2</sub> data by curve fitting in observation time.

| site     | number | $1\sigma$<br>[ppm] |
|----------|--------|--------------------|
| (1) AMS  | 153    | 0.830              |
| (2) LHR  | 105    | 0.839              |
| (3) YVR  | 224    | 1.071              |
| (4) CDG  | 134    | 1.016              |
| (5) MXP  | 50     | 0.889              |
| (6) FCO  | 44     | 0.709              |
| (7) ICN  | 75     | 1.657              |
| (8) NRT  | 3086   | 1.201              |
| (9) HND  | 179    | 1.156              |
| (10) NGO | 327    | 1.585              |
| (11) KIX | 251    | 1.145              |
| (12) DEL | 149    | 0.837              |
| (13) TPE | 51     | 0.848              |
| (14) HNL | 218    | 0.593              |
| (15) MNL | 41     | 0.581              |
| (16) BKK | 374    | 0.973              |
| (17) GUM | 28     | 0.311              |
| (18) SIN | 343    | 0.641              |
| (19) CGK | 223    | 0.656              |
| (20) SYD | 186    | 0.556              |
| (21) PFA | 76     | 0.908              |
| (22) BRM | 83     | 0.860              |
| (23) ESP | 123    | 1.097              |
| (24) DND | 46     | 1.220              |
| (25) LEF | 99     | 1.184              |
| (26) NHA | 92     | 0.986              |
| (27) WBI | 67     | 1.161              |
| (28) THD | 48     | 0.773              |
| (29) BNE | 63     | 2.303              |
| (30) CAR | 94     | 0.899              |
| (31) HIL | 65     | 1.210              |
| (32) AAO | 240    | 1.604              |
| (33) CMA | 108    | 1.158              |
| (34) SCA | 71     | 0.930              |
| (35) TGC | 69     | 0.758              |
| (36) RTA | 44     | 0.917              |
| (37) SGP | 148    | 1.248              |
| (38) YAK | 11     | 1.910              |
| (39) SUR | 42     | 3.224              |
| (40) NOV | 36     | 1.099              |
| (41) SGM | 41     | 1.454              |
| All data | 7907   | 1.149              |

Table S- 2: The average and 1 standard deviation ( $1 \sigma$ ) of the differences between GOSAT XCO<sub>2</sub> observed over land region within  $\pm 2^\circ$  and  $\pm 5^\circ$  latitude/longitude boxes centered at each aircraft site and aircraft-based XCO<sub>2</sub> using curve fitting method.

| Land     |        | $\pm 2$ deg. |           |        | $\pm 5$ deg. |           |  |
|----------|--------|--------------|-----------|--------|--------------|-----------|--|
| site     | number | average      | $1\sigma$ | number | average      | $1\sigma$ |  |
|          |        | [ppm]        | [ppm]     |        | [ppm]        | [ppm]     |  |
| (1) AMS  | 14     | 0.481        | 2.262     | 124    | -1.564       | 2.084     |  |
| (2) LHR  | 40     | -0.957       | 2.088     | 155    | -1.112       | 2.063     |  |
| (3) YVR  | 6      | 0.328        | 4.117     | 166    | -1.373       | 2.471     |  |
| (4) CDG  | 57     | -1.393       | 1.905     | 262    | -1.373       | 2.054     |  |
| (5) MXP  | 32     | 0.071        | 2.501     | 181    | 0.444        | 2.481     |  |
| (6) FCO  | 43     | -1.301       | 2.126     | 195    | -2.089       | 2.346     |  |
| (7) ICN  | 66     | 0.287        | 2.828     | 189    | -0.254       | 2.846     |  |
| (8) NRT  | 65     | -0.461       | 2.259     | 105    | -0.545       | 2.471     |  |
| (9) HND  | 76     | -0.897       | 2.408     | 108    | -1.040       | 2.507     |  |
| (10) NGO | 25     | -0.459       | 2.792     | 120    | -0.339       | 2.442     |  |
| (11) KIX | 18     | -0.770       | 2.507     | 103    | -0.162       | 2.484     |  |
| (12) DEL | 214    | -1.548       | 1.857     | 854    | -2.153       | 1.940     |  |
| (13) TPE | 11     | 0.899        | 1.712     | 70     | 0.559        | 2.165     |  |
| (14) HNL | 0      | -            | -         | 0      | -            | -         |  |
| (15) MNL | 0      | -            | -         | 2      | -3.968       | 0.641     |  |
| (16) BKK | 18     | 0.215        | 2.214     | 77     | -0.798       | 2.391     |  |
| (17) GUM | 0      | -            | -         | 0      | -            | -         |  |
| (18) SIN | 0      | -            | -         | 0      | -            | -         |  |
| (19) CGK | 2      | -1.147       | 0.565     | 5      | -1.561       | 0.616     |  |
| (20) SYD | 83     | -0.740       | 2.314     | 370    | -1.448       | 2.067     |  |
| (21) PFA | 37     | 0.574        | 1.990     | 108    | -0.653       | 2.322     |  |
| (22) BRM | 43     | -0.018       | 2.944     | 286    | -0.991       | 2.810     |  |
| (23) ESP | 0      | -            | -         | 84     | -0.826       | 2.529     |  |
| (24) DND | 70     | -2.264       | 1.689     | 402    | -1.483       | 2.455     |  |
| (25) LEF | 60     | -1.623       | 2.359     | 299    | -1.412       | 2.641     |  |
| (26) NHA | 23     | -1.602       | 1.431     | 169    | -1.106       | 2.290     |  |
| (27) WBI | 44     | -2.210       | 2.434     | 615    | -2.246       | 1.954     |  |
| (28) THD | 80     | 0.147        | 2.282     | 329    | -0.746       | 2.087     |  |
| (29) BNE | 132    | -3.014       | 1.909     | 765    | -3.095       | 2.295     |  |
| (30) CAR | 161    | -3.542       | 1.678     | 766    | -3.287       | 2.004     |  |
| (31) HIL | 173    | -2.514       | 1.615     | 628    | -2.416       | 1.933     |  |
| (32) AAO | 139    | -1.122       | 2.002     | 621    | -1.140       | 2.073     |  |
| (33) CMA | 45     | -0.933       | 2.417     | 205    | -1.410       | 2.322     |  |
| (34) SCA | 80     | -1.636       | 1.763     | 521    | -1.548       | 1.908     |  |
| (35) TGC | 47     | -1.491       | 1.639     | 546    | -1.709       | 1.705     |  |
| (36) RTA | 0      | -            | -         | 0      | -            | -         |  |
| (37) SGP | 184    | -2.809       | 1.740     | 835    | -2.745       | 1.926     |  |
| (38) YAK | 50     | -1.962       | 2.303     | 183    | -2.070       | 2.408     |  |
| (39) SUR | 52     | -2.150       | 2.495     | 269    | -2.752       | 2.633     |  |
| (40) NOV | 53     | -1.250       | 2.593     | 323    | -1.469       | 2.823     |  |
| (41) SGM | 70     | 0.594        | 2.494     | 106    | 0.384        | 2.575     |  |
| All data | 2313   | -1.555       | 2.364     | 11146  | -1.813       | 2.373     |  |

Table S- 3: The average and 1 standard deviation ( $1 \sigma$ ) of the differences between GOSAT XCO<sub>2</sub> observed over ocean region within  $\pm 2^\circ$  and  $\pm 5^\circ$  latitude/longitude boxes centered at each aircraft site and aircraft-based XCO<sub>2</sub> using curve fitting method.

| Ocean    |        | $\pm 2$ deg.     |                    |        | $\pm 5$ deg.     |                    |  |
|----------|--------|------------------|--------------------|--------|------------------|--------------------|--|
| site     | number | average<br>[ppm] | $1\sigma$<br>[ppm] | number | average<br>[ppm] | $1\sigma$<br>[ppm] |  |
| (1) AMS  | 0      | -                | -                  | 0      | -                | -                  |  |
| (2) LHR  | 0      | -                | -                  | 1      | -1.712           | -                  |  |
| (3) YVR  | 0      | -                | -                  | 1      | 0.699            | -                  |  |
| (4) CDG  | 0      | -                | -                  | 0      | -                | -                  |  |
| (5) MXP  | 1      | 0.793            | -                  | 4      | -0.732           | 1.562              |  |
| (6) FCO  | 0      | -                | -                  | 31     | -4.652           | 2.164              |  |
| (7) ICN  | 0      | -                | -                  | 55     | -1.661           | 3.537              |  |
| (8) NRT  | 1      | 0.455            | -                  | 9      | -2.952           | 3.051              |  |
| (9) HND  | 1      | 0.414            | -                  | 10     | -2.631           | 2.770              |  |
| (10) NGO | 0      | -                | -                  | 19     | -2.435           | 4.009              |  |
| (11) KIX | 0      | -                | -                  | 35     | -2.699           | 3.565              |  |
| (12) DEL | 0      | -                | -                  | 0      | -                | -                  |  |
| (13) TPE | 19     | -0.633           | 2.704              | 38     | -0.283           | 2.835              |  |
| (14) HNL | 30     | -2.062           | 1.271              | 98     | -1.639           | 1.330              |  |
| (15) MNL | 0      | -                | -                  | 66     | -1.857           | 1.664              |  |
| (16) BKK | 4      | -4.054           | 1.868              | 11     | -3.500           | 1.505              |  |
| (17) GUM | 1      | 0.834            | -                  | 44     | -0.750           | -1.454             |  |
| (18) SIN | 1      | -1.503           | -                  | 4      | -2.151           | 0.772              |  |
| (19) CGK | 3      | -1.161           | 1.361              | 21     | -2.049           | 1.495              |  |
| (20) SYD | 1      | -1.578           | -                  | 54     | -1.538           | 1.544              |  |
| (21) PFA | 0      | -                | -                  | 0      | -                | -                  |  |
| (22) BRM | 0      | -                | -                  | 0      | -                | -                  |  |
| (23) ESP | 1      | 0.901            | -                  | 1      | 0.901            | -                  |  |
| (24) DND | 0      | -                | -                  | 0      | -                | -                  |  |
| (25) LEF | 0      | -                | -                  | 0      | -                | -                  |  |
| (26) NHA | 1      | -0.927           | -                  | 6      | -2.934           | 1.999              |  |
| (27) WBI | 0      | -                | -                  | 0      | -                | -                  |  |
| (28) THD | 0      | -                | -                  | 3      | -1.172           | 3.231              |  |
| (29) BNE | 0      | -                | -                  | 0      | -                | -                  |  |
| (30) CAR | 0      | -                | -                  | 0      | -                | -                  |  |
| (31) HIL | 0      | -                | -                  | 0      | -                | -                  |  |
| (32) AAO | 0      | -                | -                  | 0      | -                | -                  |  |
| (33) CMA | 3      | -2.070           | 1.142              | 24     | -1.094           | 2.491              |  |
| (34) SCA | 0      | -                | -                  | 63     | -0.959           | 1.959              |  |
| (35) TGC | 0      | -                | -                  | 58     | -1.501           | 1.379              |  |
| (36) RTA | 17     | -1.939           | 1.561              | 45     | -2.170           | 1.280              |  |
| (37) SGP | 0      | -                | -                  | 0      | -                | -                  |  |
| (38) YAK | 0      | -                | -                  | 0      | -                | -                  |  |
| (39) SUR | 0      | -                | -                  | 0      | -                | -                  |  |
| (40) NOV | 0      | -                | -                  | 0      | -                | -                  |  |
| (41) SGM | 1      | 3.845            | -                  | 7      | 0.093            | 3.513              |  |
| All data | 85     | -1.524           | 2.016              | 708    | -1.729           | 2.349              |  |

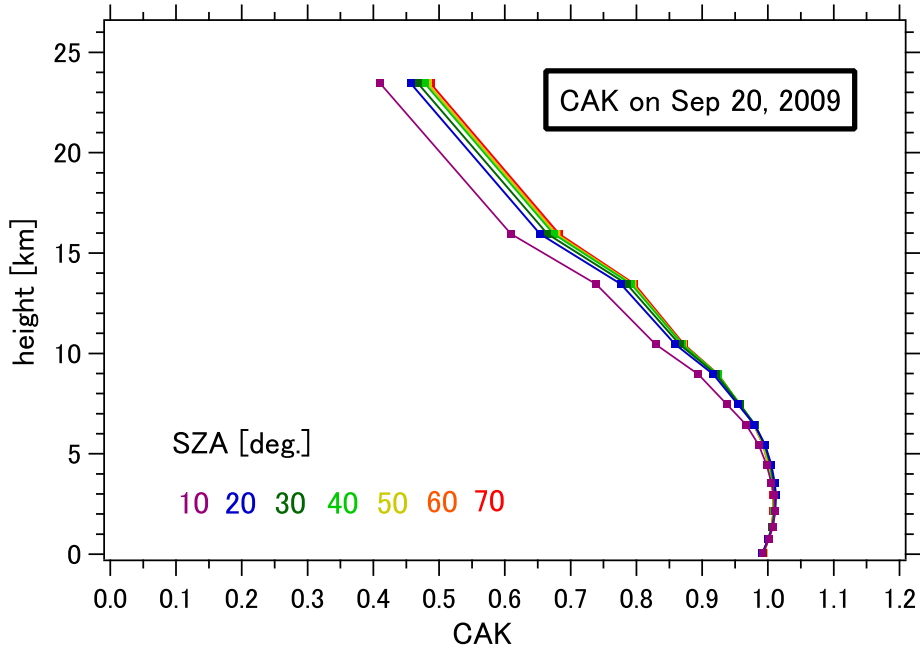

Fig. S- 1: Examples of CAK for GOSAT XCO<sub>2</sub> on 20 September, 2009. The shapes of CAKs at seven different solar zenith angles are shown by color.

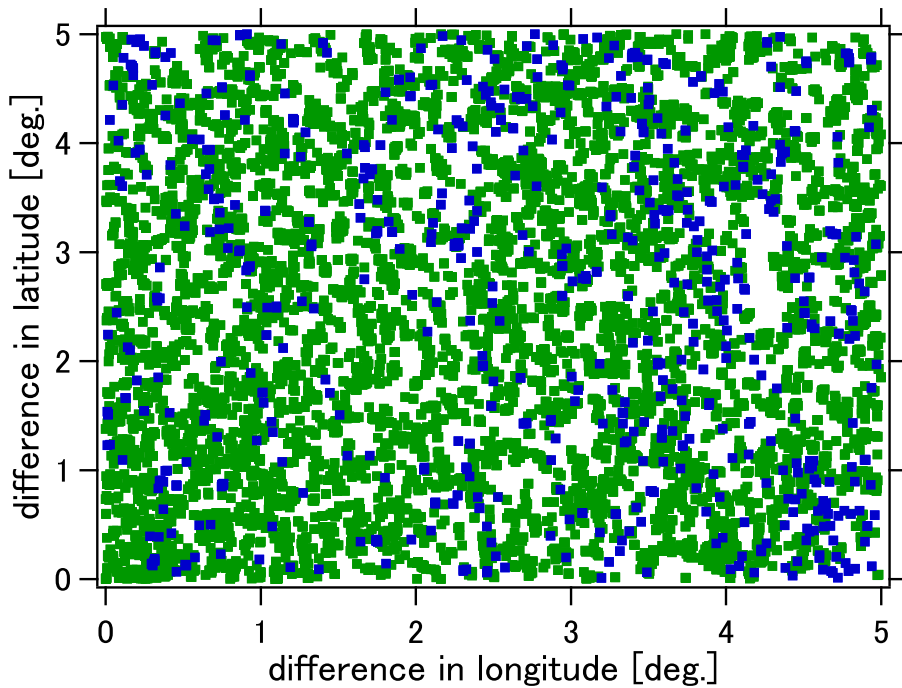

Fig. S- 2: The distance from each aircraft site to the location of GOSAT data obtained within  $\pm 5^\circ$  latitude/longitude boxes of each site (i.e. absolute values of the latitude/longitude differences). Green and blue dots indicate the distance from aircraft site to the location of the GOSAT data retrieved over land and ocean, respectively.

(1) AMS

(2) LHR

(3) YVR

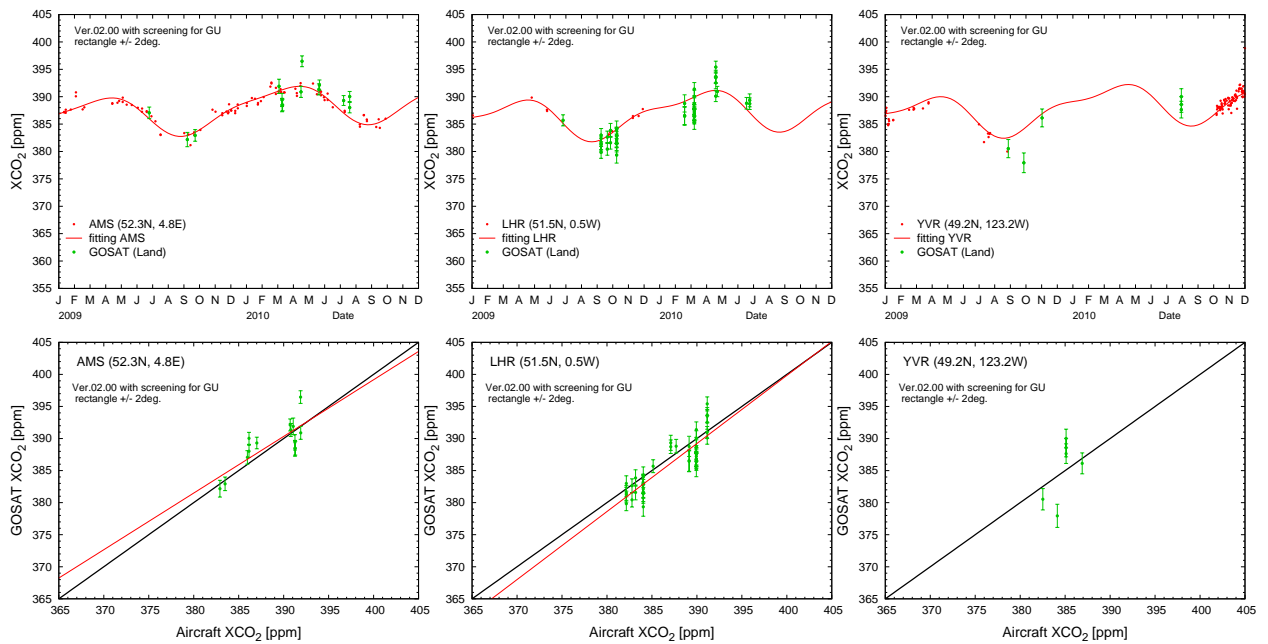

(4) CDG

(5) MXP

(6) FCO

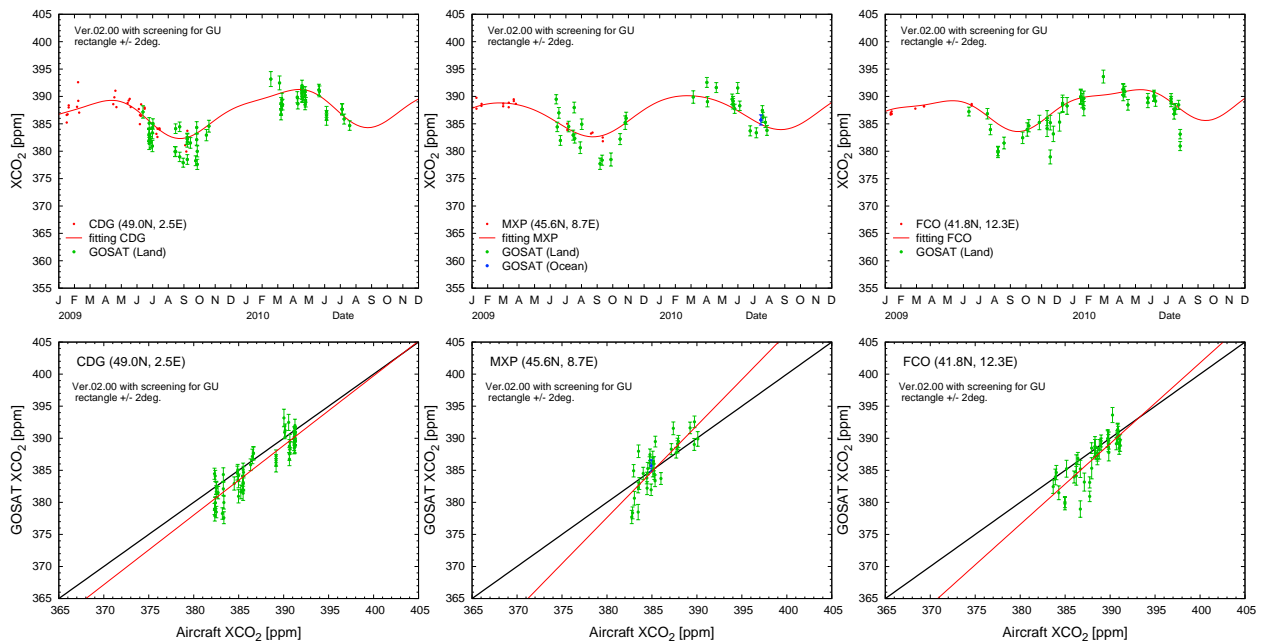

Fig. S- 3: Temporal variations of aircraft-based XCO<sub>2</sub> and GOSAT XCO<sub>2</sub> observed within  $\pm 2^\circ$  attitude/longitude boxes centered at each aircraft site (upper panels) and their scatter diagrams (bottom panels) for (1) Amsterdam, (2) London, (3) Vancouver, (4) Paris, (5) Milan, and (6) Rome. Green and blue dots show the GOSAT XCO<sub>2</sub> data over land and ocean regions, respectively. Red dots and lines in the upper panels indicate the aircraft-based XCO<sub>2</sub> and fitted curves based on their data, respectively. Red and blue lines in the bottom panels denote the regression lines with statistical significance at the 95% level over land and ocean regions, respectively. The one-to-one lines are plotted as black lines.

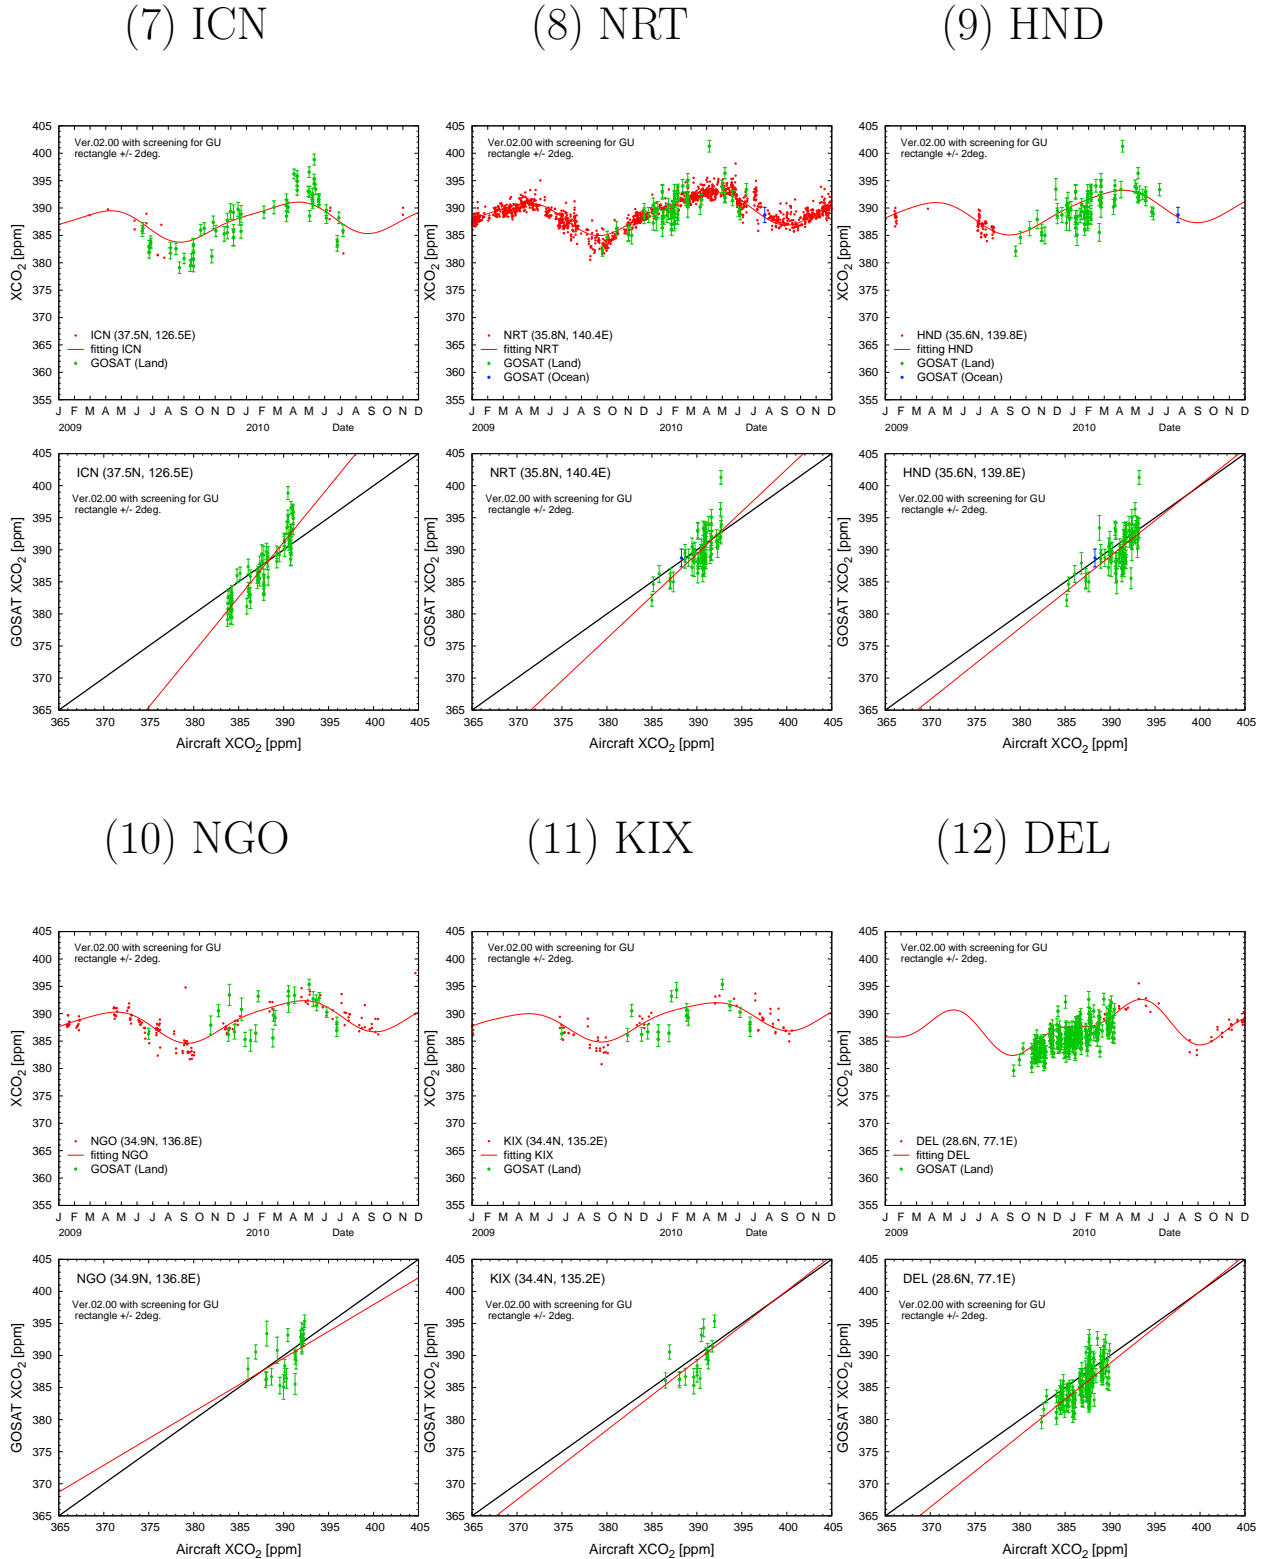

Fig. S- 4: Temporal variations of aircraft-based XCO<sub>2</sub> and GOSAT XCO<sub>2</sub> observed within  $\pm 2^\circ$  latitude/longitude boxes centered at each aircraft site (upper panels) and their scatter diagrams (bottom panels) for (7) Incheon, (8) Narita, (9) Haneda, (10) Nagoya, (11) Kansai, and (12) Delhi. The others are the same as in Fig. S-3.



(13) TPE

(14) HNL

(15) MNL

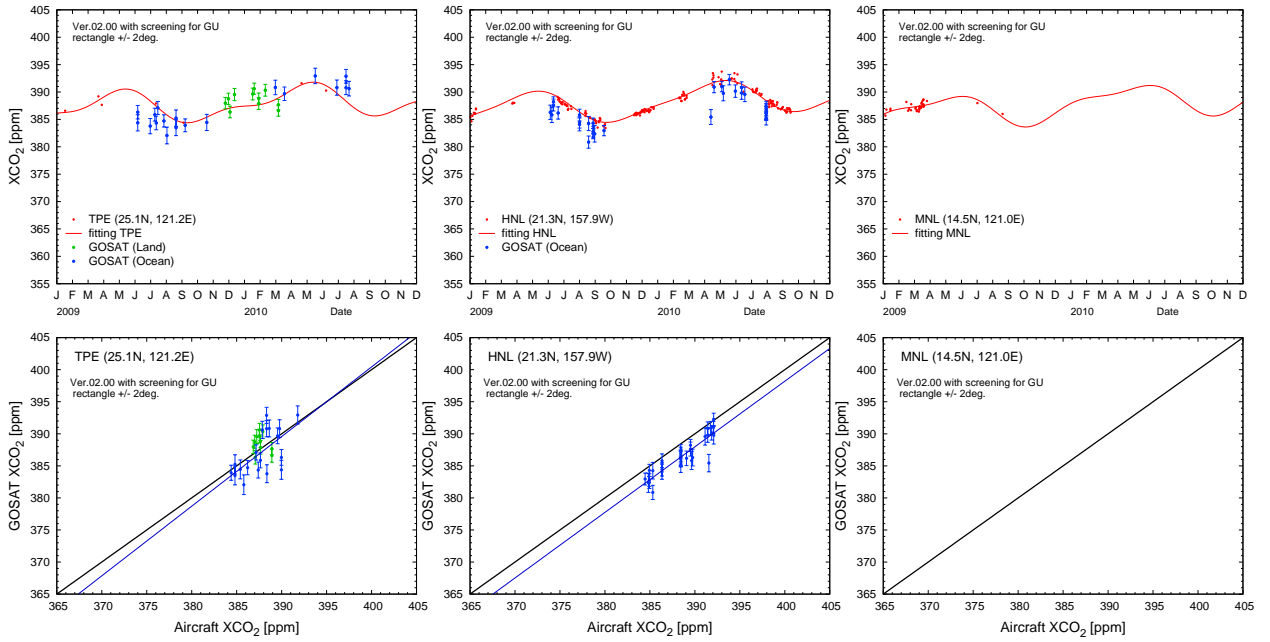

(16) BKK

(17) GUM

(18) SIN

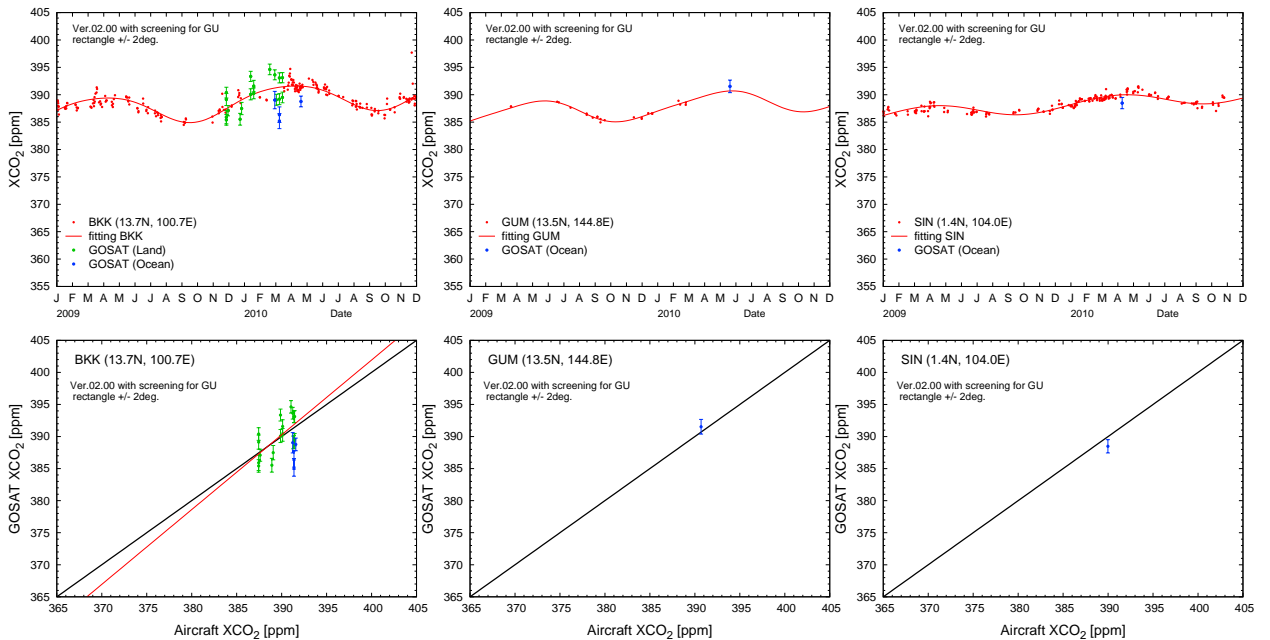

Fig. S- 5: Temporal variations of aircraft-based XCO<sub>2</sub> and GOSAT XCO<sub>2</sub> observed within  $\pm 2^\circ$  latitude/longitude boxes centered at each aircraft site (upper panels) and their scatter diagrams (bottom panels) for (13) Taipei, (14) Honolulu, (15) Manila, (16) Bangkok, (17) Guam, and (18) Singapore. The others are the same as in Fig. S-3.

(19) CGK

(20) SYD

(21) PFA

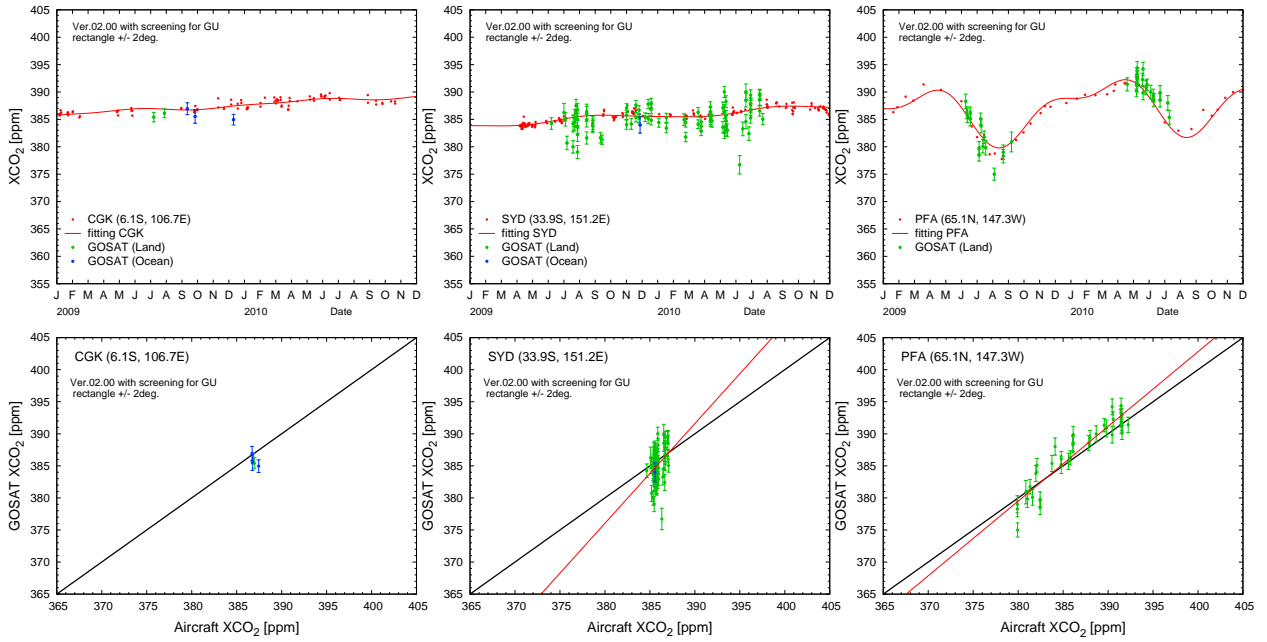

(22) BRM

(23) ESP

(24) DND

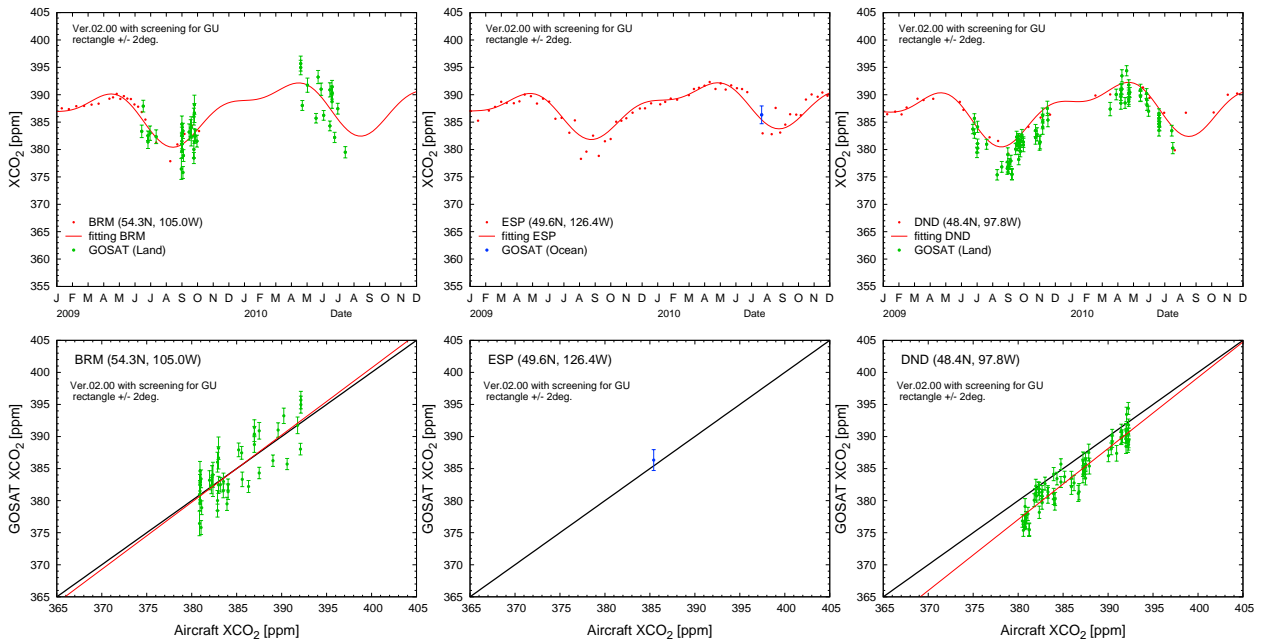

Fig. S- 6: Temporal variations of aircraft-based XCO<sub>2</sub> and GOSAT XCO<sub>2</sub> observed within  $\pm 2^\circ$  latitude/longitude boxes centered at each aircraft site (upper panels) and their scatter diagrams (bottom panels) for (19) Jakarta, (20) Sydney, (21) Poker Flat, (22) BERMS, (23) Estevan Point, and (24) Dahlen. The others are the same as in Fig. S-3.

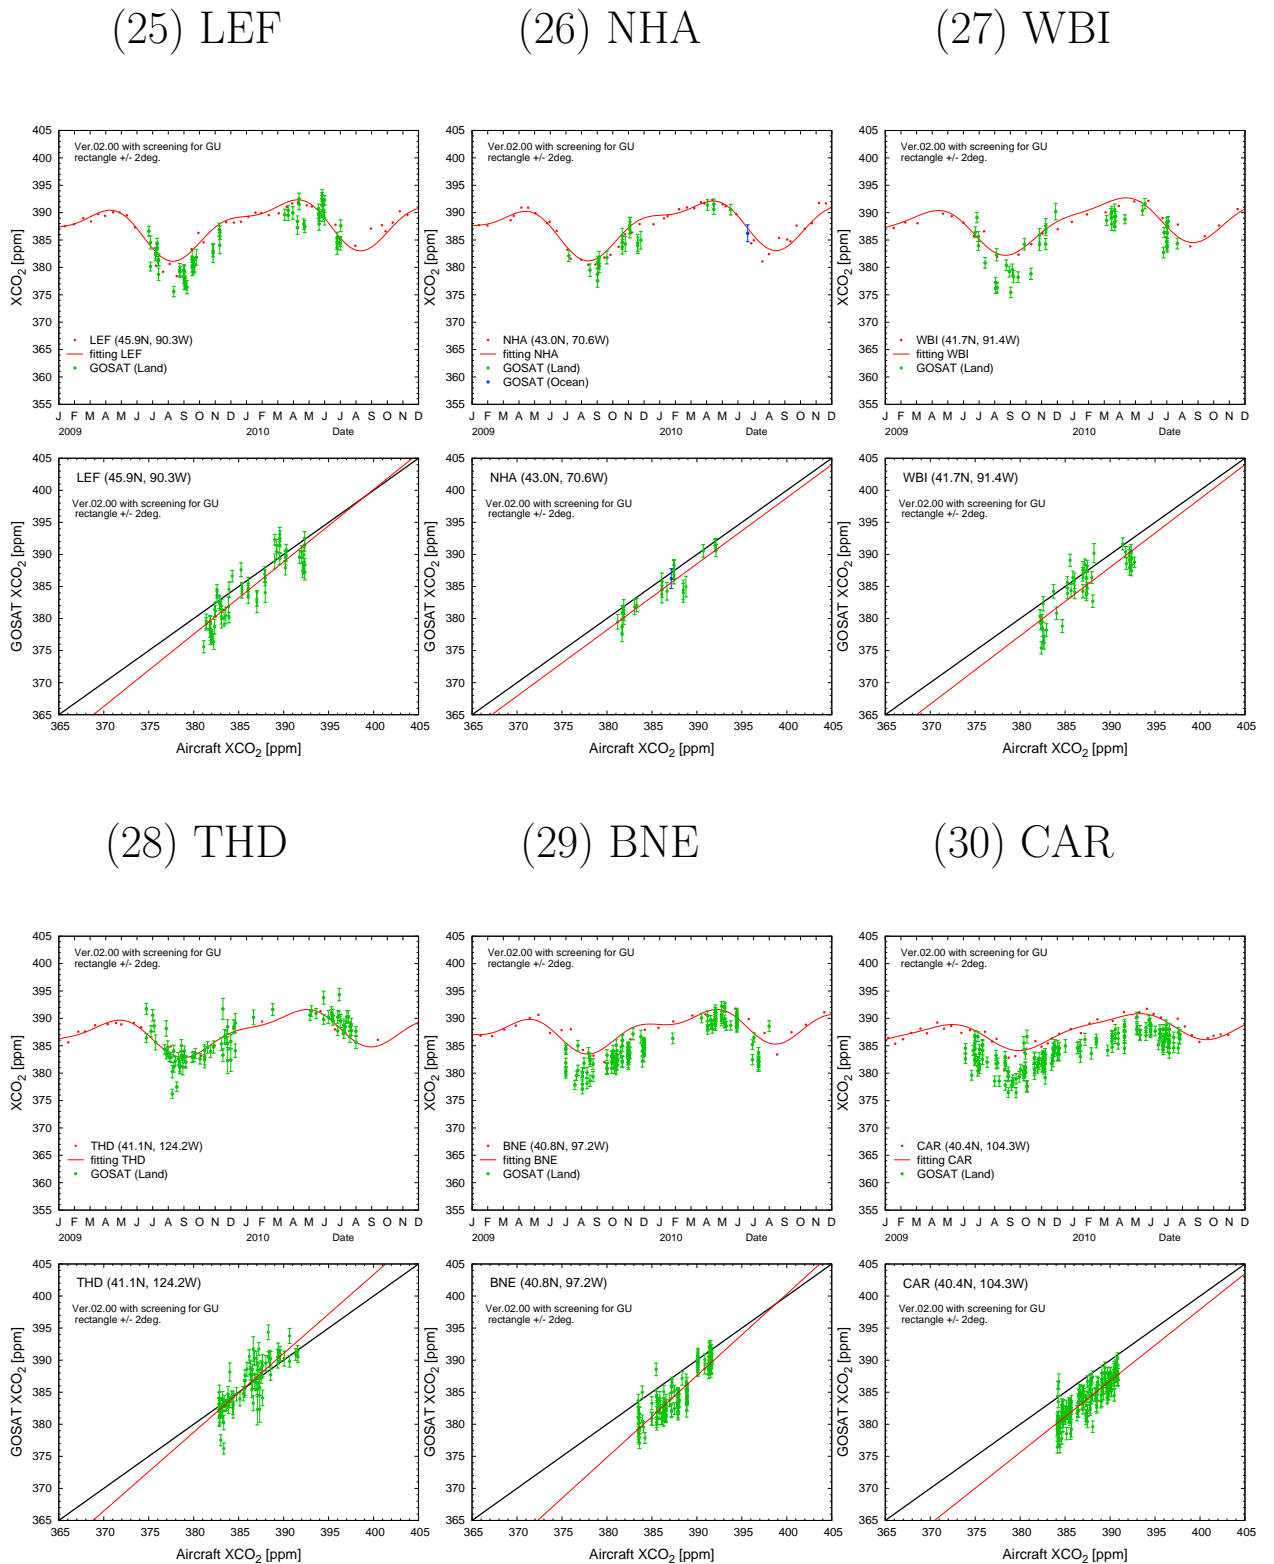

Fig. S- 7: Temporal variations of aircraft-based XCO<sub>2</sub> and GOSAT XCO<sub>2</sub> observed within  $\pm 2^\circ$  latitude/longitude boxes centered at each aircraft site (upper panels) and their scatter diagrams (bottom panels) for (25) Park Falls, (26) Worcester, (27) West Branch, (28) Trinidad Head, (29) Beaver Crossing, and (30) Briggsdale. The others are the same as in Fig. S-3.

(31) HIL

(32) AAO

(33) CMA

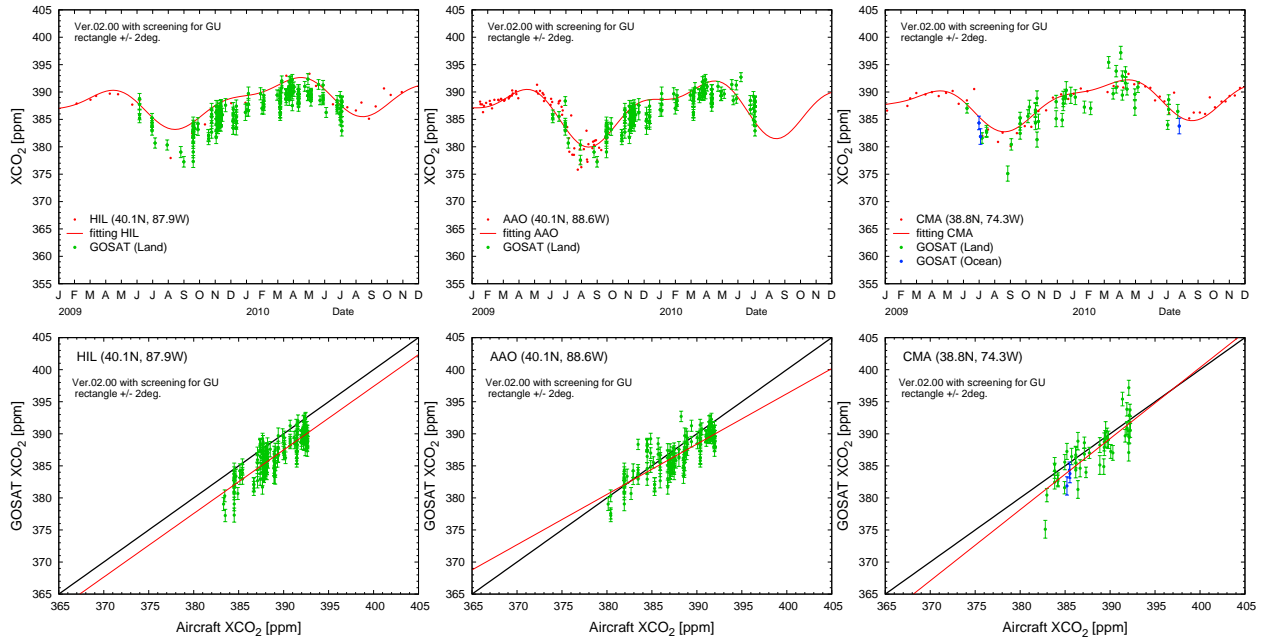

(34) SCA

(35) TGC

(36) RTA

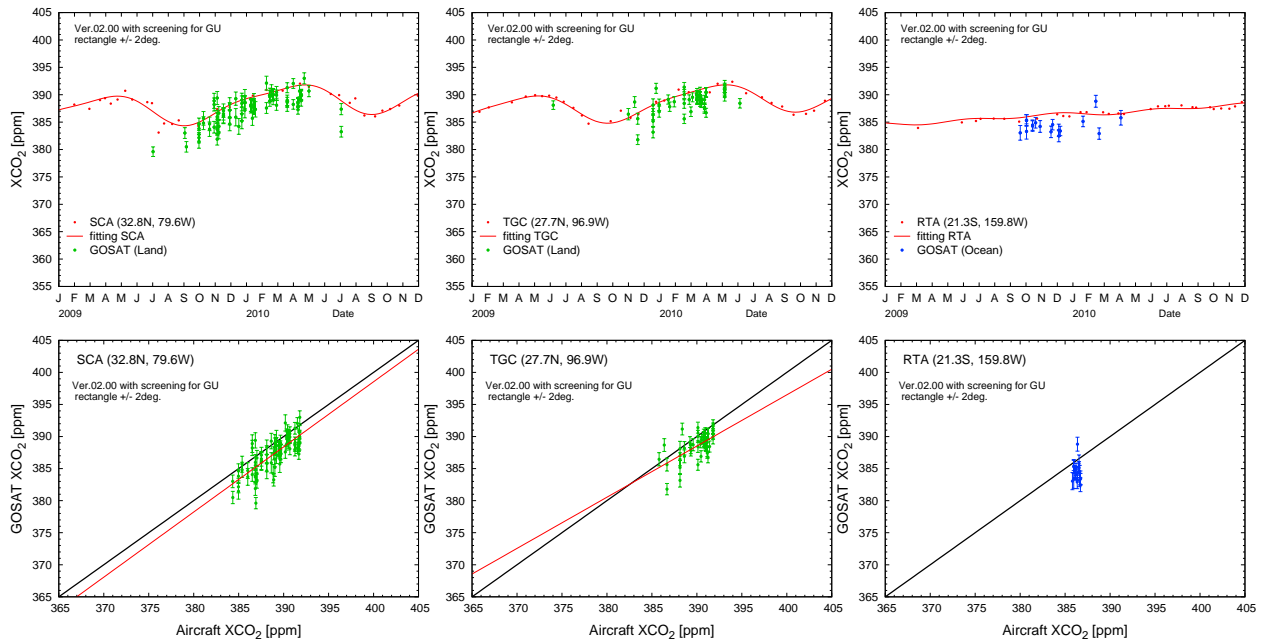

Fig. S- 8: Temporal variations of aircraft-based XCO<sub>2</sub> and GOSAT XCO<sub>2</sub> observed within  $\pm 2^\circ$  latitude/longitude boxes centered at each aircraft site (upper panels) and their scatter diagrams (bottom panels) for (31) Homer, (32) Bondville, (33) Cape May, (34) Charleston, (35) Sinton, and (36) Rarotonga. The others are the same as in Fig. S-3.

(37) SGP

(38) YAK

(39) SUR

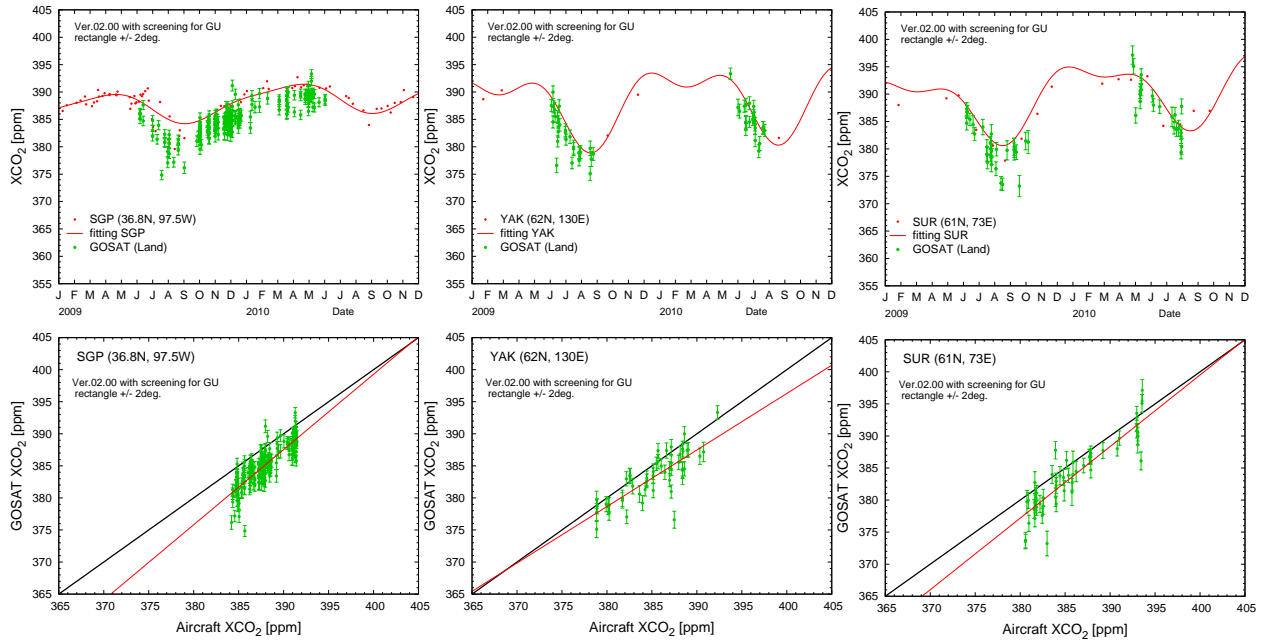

(40) NOV

(41) SGM

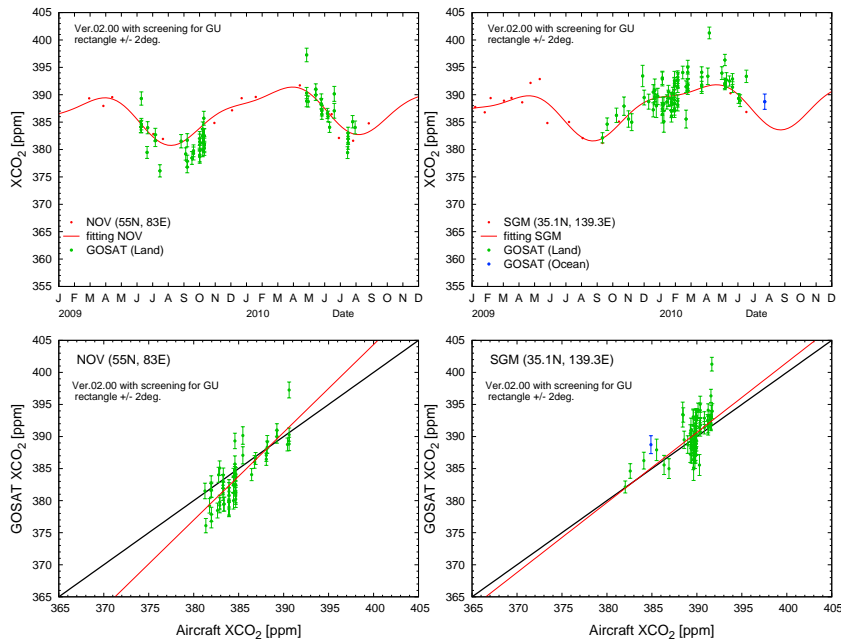

Fig. S- 9: Temporal variations of aircraft-based XCO<sub>2</sub> and GOSAT XCO<sub>2</sub> observed within  $\pm 2^\circ$  latitude/longitude boxes centered at each aircraft site (upper panels) and their scatter diagrams (bottom panels) for (37) the Southern Great Plains, (38) Yakutsk, (39) Surgut, (40) Novosibirsk, and (41) Sagami-bay. The others are the same as in Fig. S-3.

(1) AMS

(2) LHR

(3) YVR

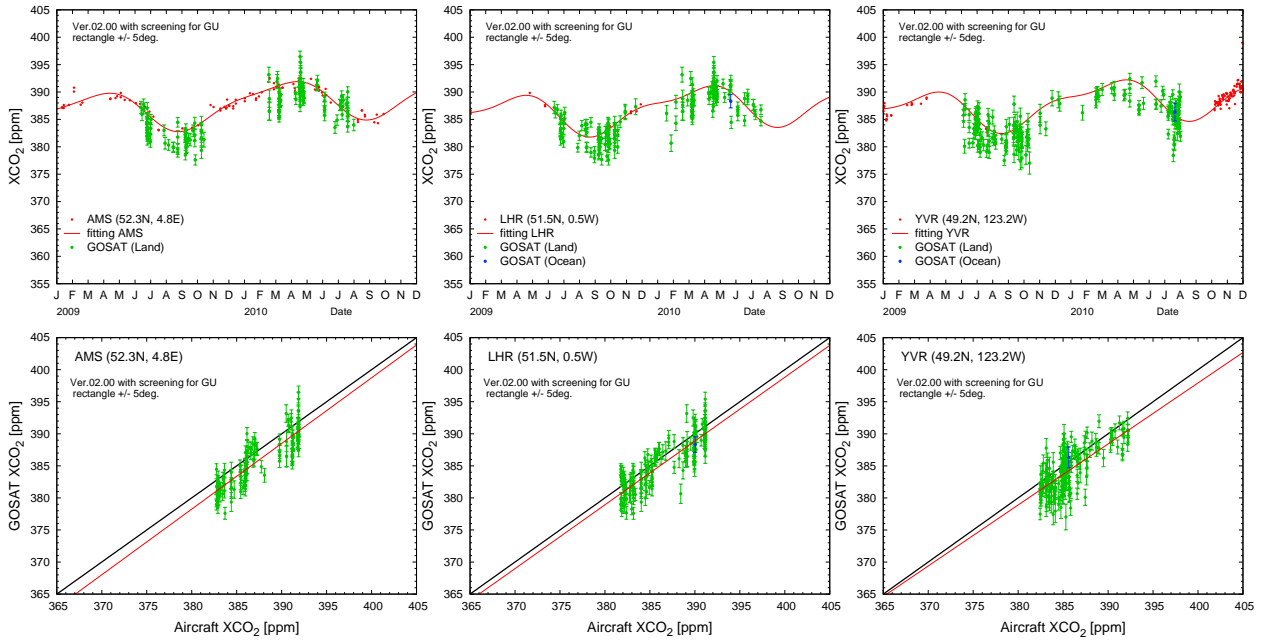

(4) CDG

(5) MXP

(6) FCO

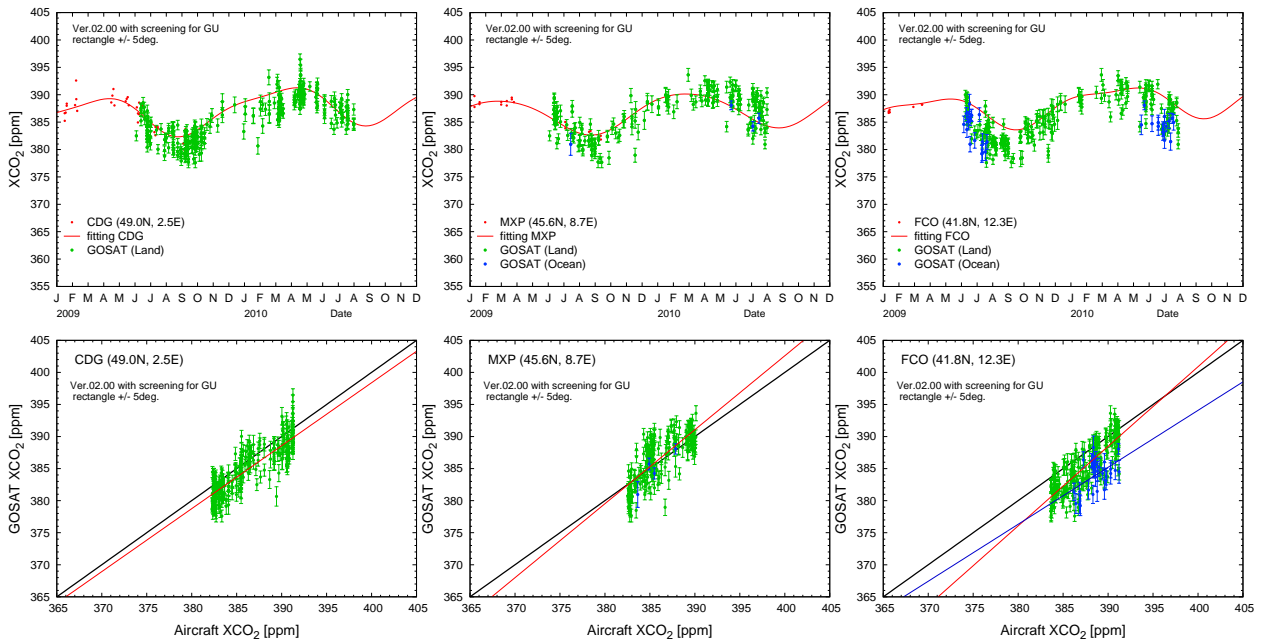

Fig. S- 10: Temporal variations of aircraft-based XCO<sub>2</sub> and GOSAT XCO<sub>2</sub> observed within  $\pm 5^\circ$  latitude/longitude boxes centered at each aircraft site (upper panels) and their scatter diagrams (bottom panels) for (1) Amsterdam, (2) London, (3) Vancouver, (4) Paris, (5) Milan, and (6) Rome. The others are the same as in Fig. S-3.

(7) ICN

(8) NRT

(9) HND

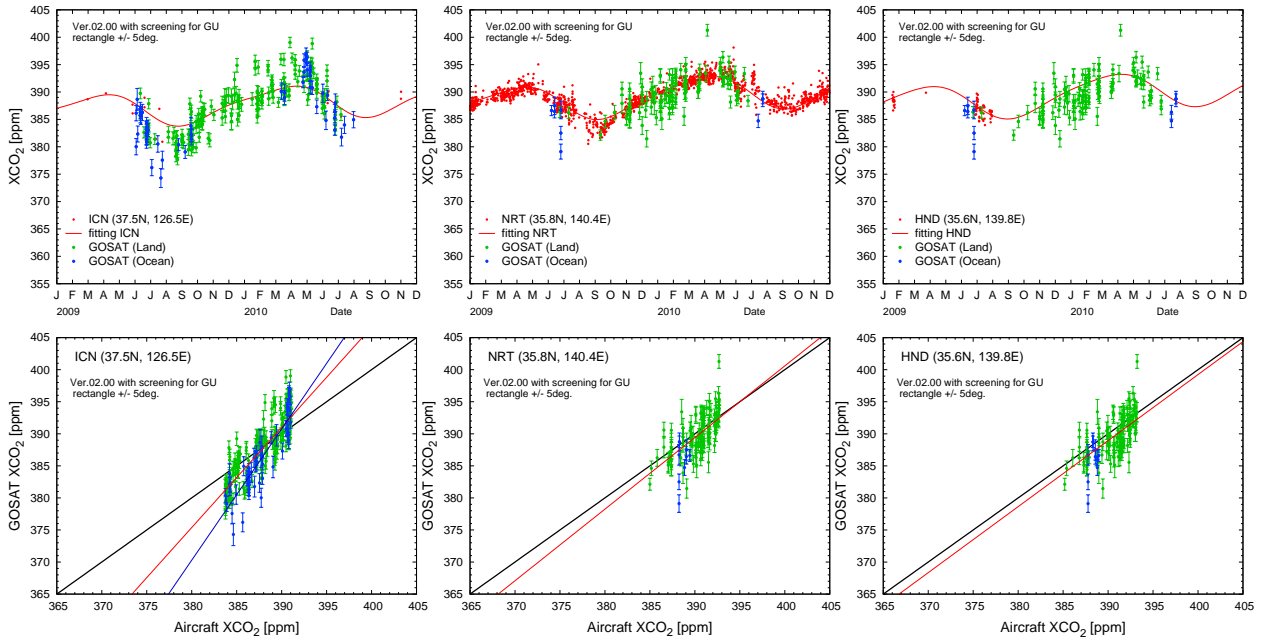

(10) NGO

(11) KIX

(12) DEL

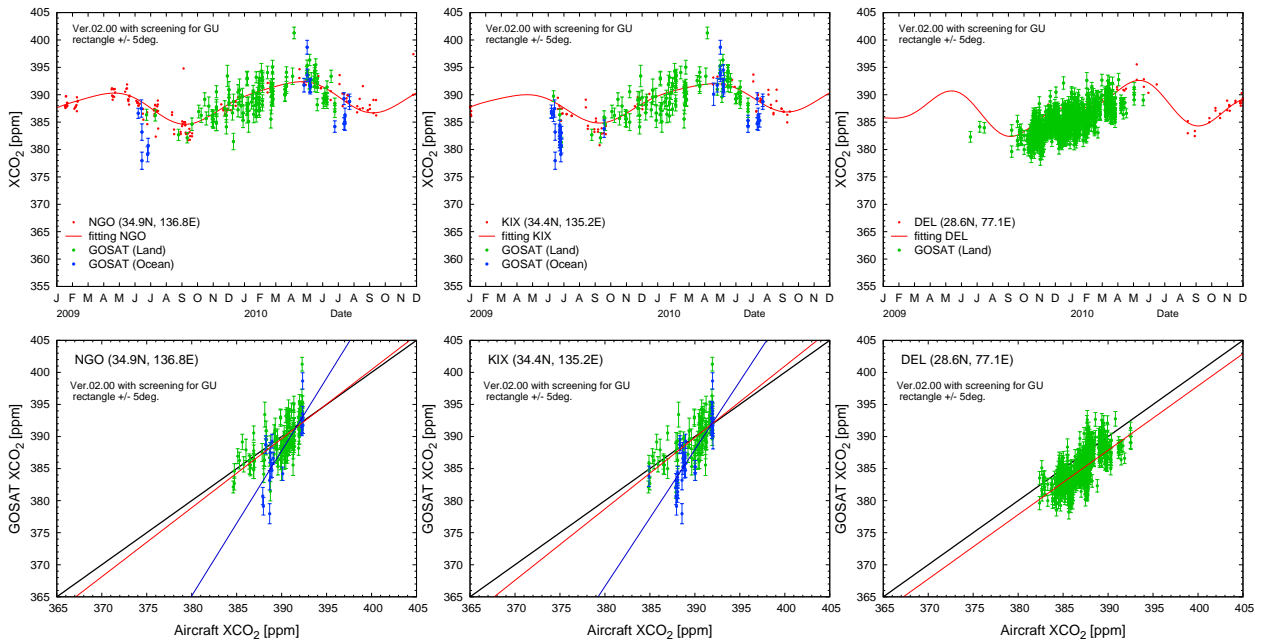

Fig. S- 11: Temporal variations of aircraft-based XCO<sub>2</sub> and GOSAT XCO<sub>2</sub> observed within  $\pm 5^\circ$  latitude/longitude boxes centered at each aircraft site (upper panels) and their scatter diagrams (bottom panels) for (7) Incheon, (8) Narita, (9) Haneda, (10) Nagoya, (11) Kansai, and (12) Delhi. The others are the same as in Fig. S-3.

(13) TPE

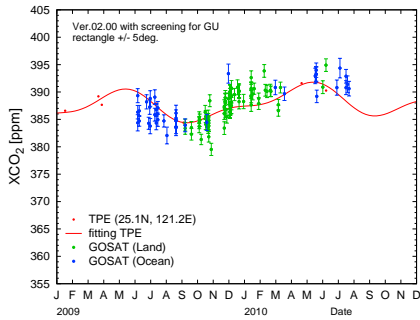

(14) HNL

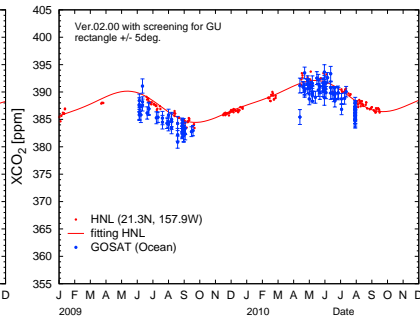

(15) MNL

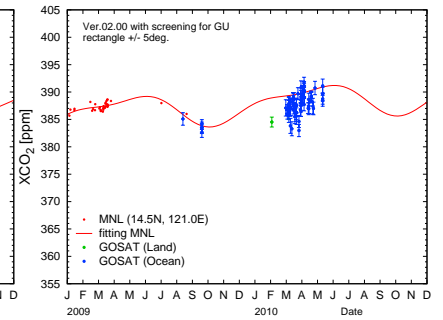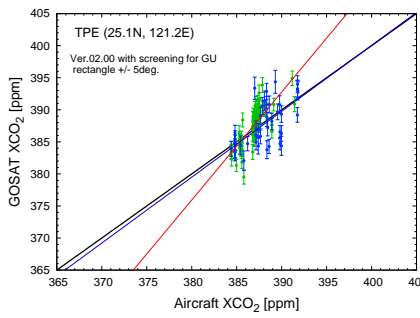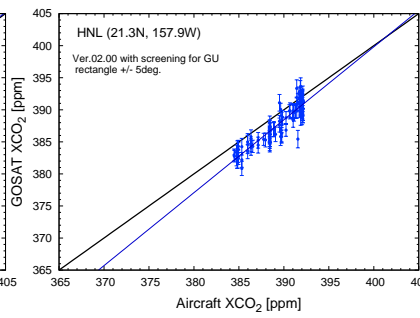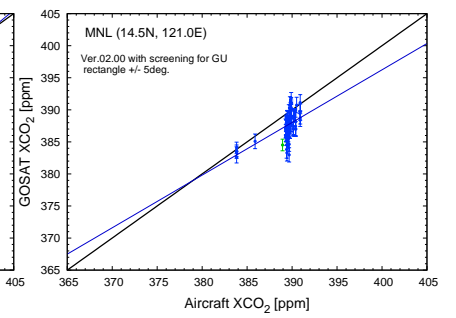

(16) BKK

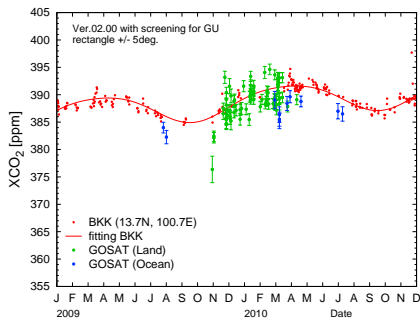

(17) GUM

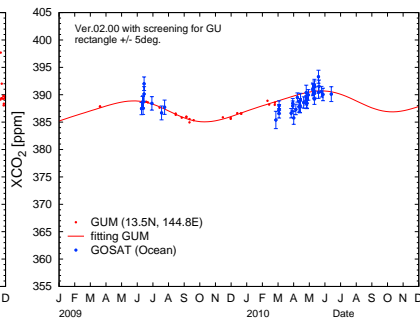

(18) SIN

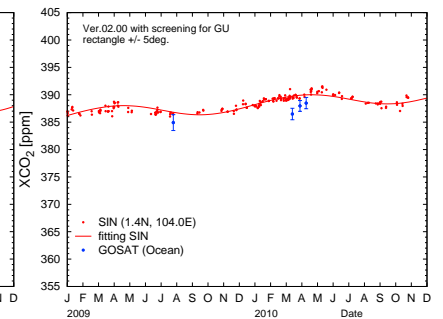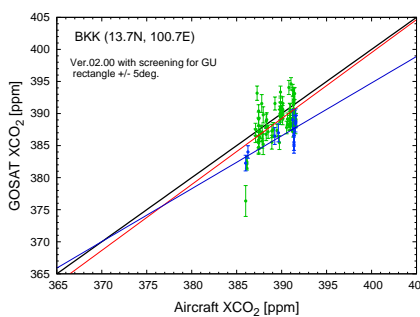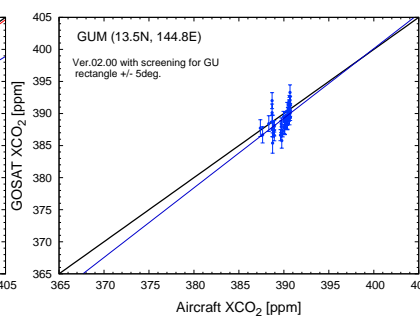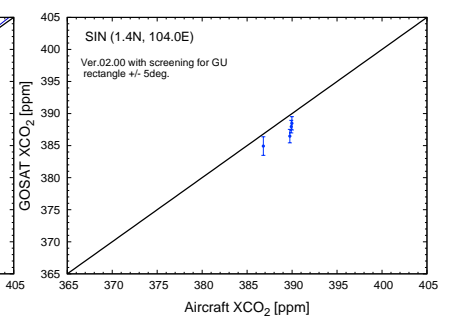

Fig. S- 12: Temporal variations of aircraft-based XCO<sub>2</sub> and GOSAT XCO<sub>2</sub> observed within  $\pm 5^\circ$  latitude/longitude boxes centered at each aircraft site (upper panels) and their scatter diagrams (bottom panels) for (13) Taipei, (14) Honolulu, (15) Manila, (16) Bangkok, (17) Guam, and (18) Singapore. The others are the same as in Fig. S-3.



(19) CGK

(20) SYD

(21) PFA

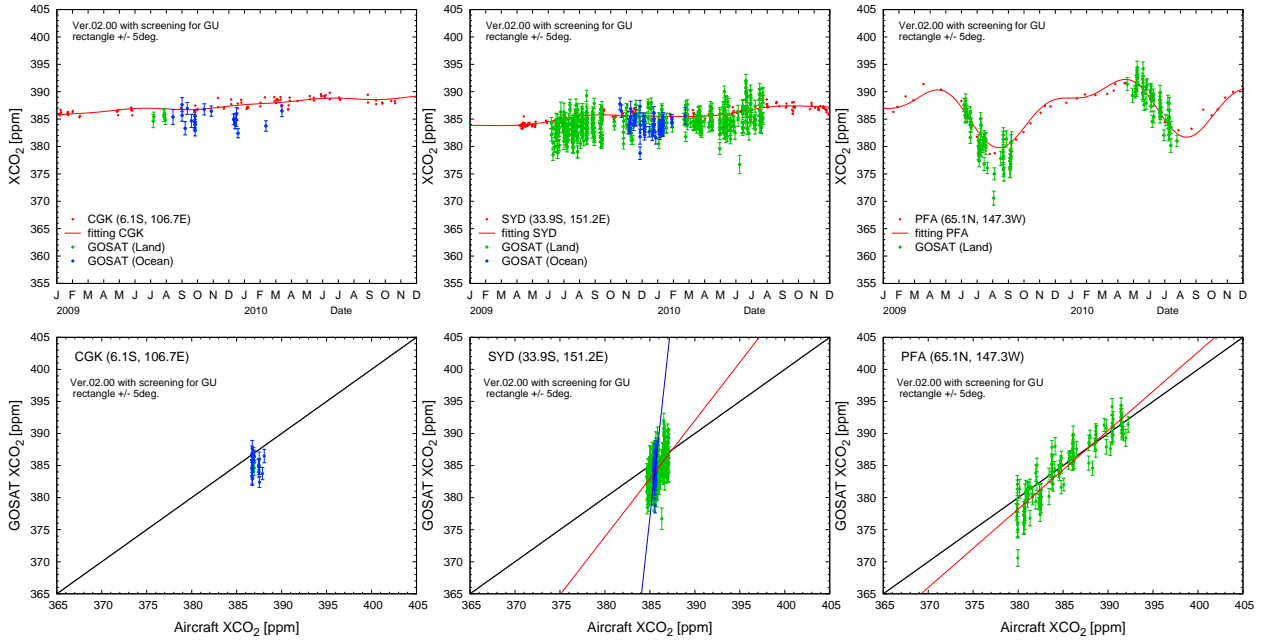

(22) BRM

(23) ESP

(24) DND

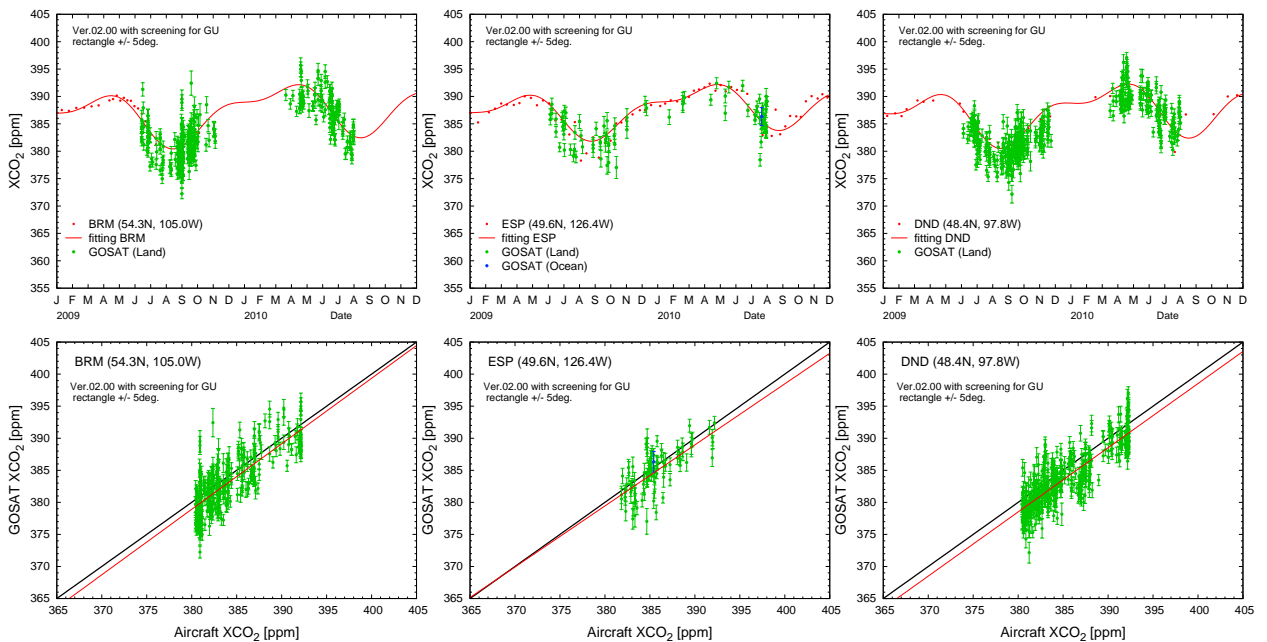

Fig. S- 13: Temporal variations of aircraft-based XCO<sub>2</sub> and GOSAT XCO<sub>2</sub> observed within ±5° latitude/longitude boxes centered at each aircraft site (upper panels) and their scatter diagrams (bottom panels) for (19) Jakarta, (20) Sydney, (21) Poker Flat, (22) BERMS, (23) Estevan Point, and (24) Dahlen. The others are the same as in Fig. S-3.

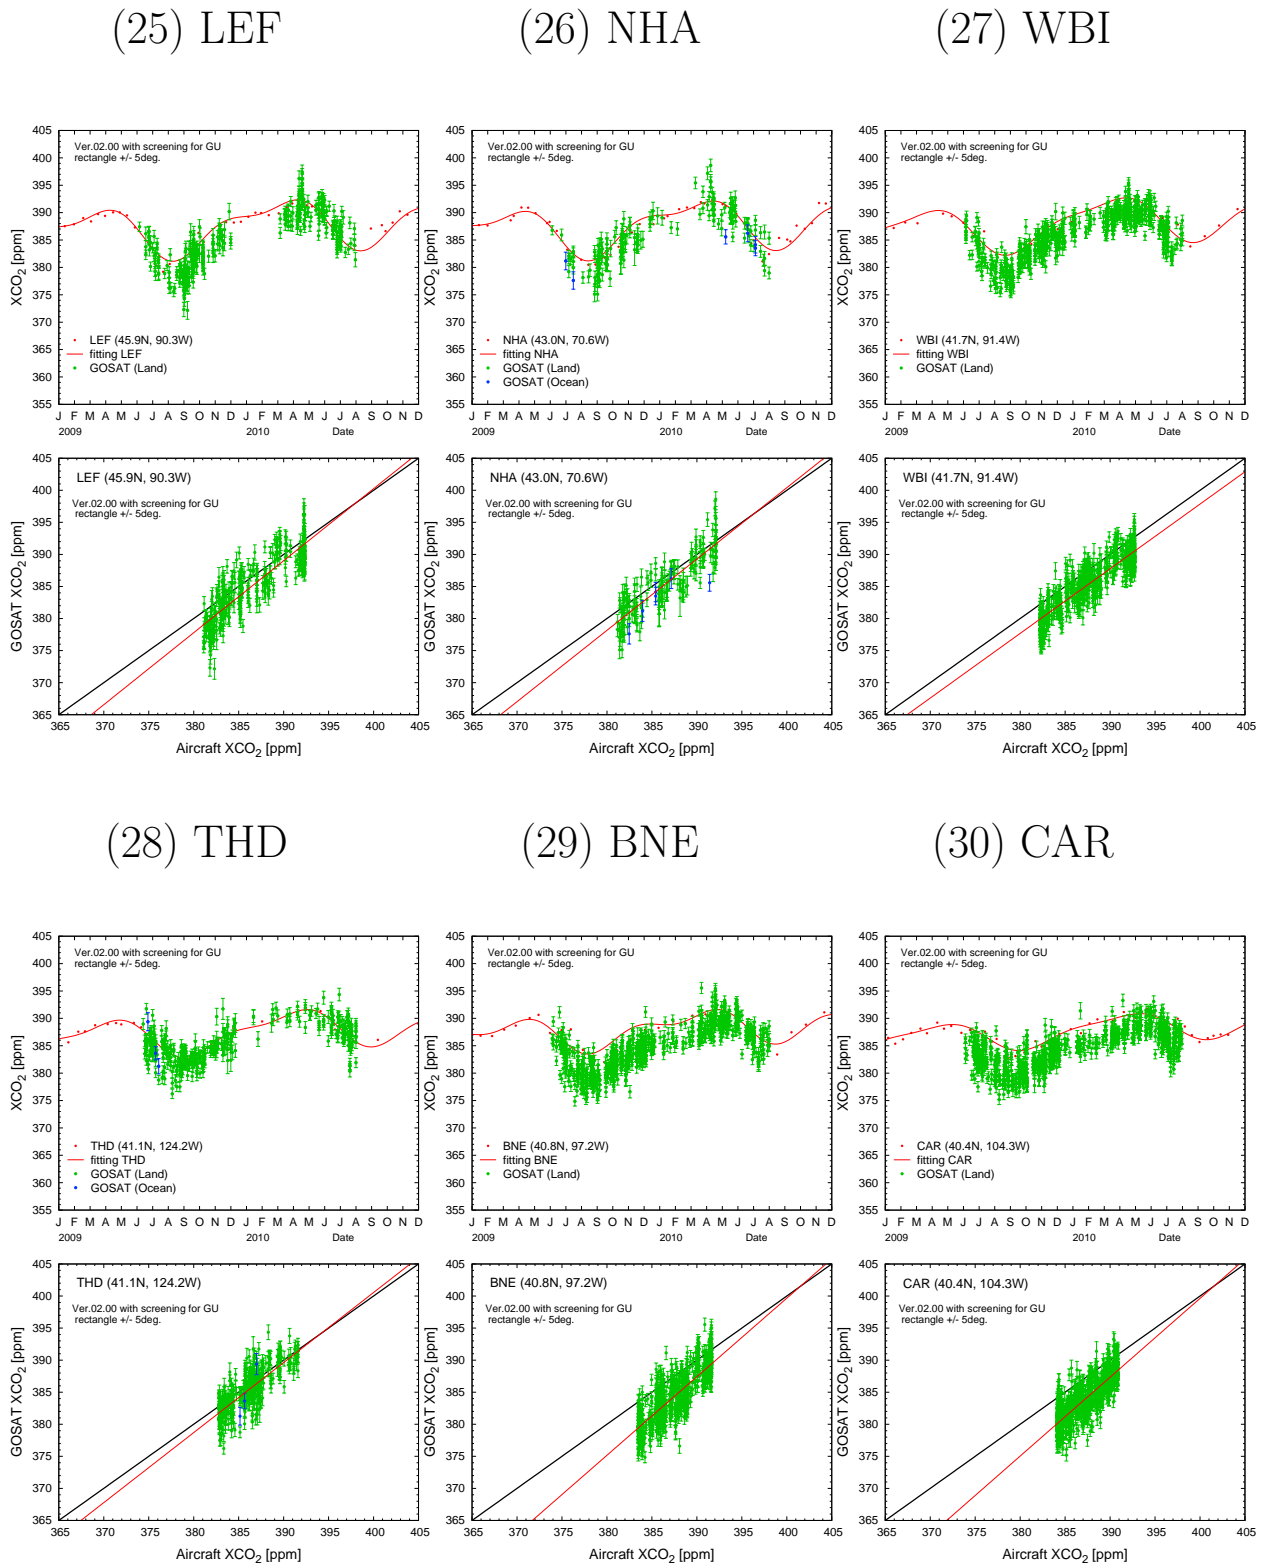

Fig. S- 14: Temporal variations of aircraft-based  $XCO_2$  and GOSAT  $XCO_2$  observed within  $\pm 5^\circ$  latitude/longitude boxes centered at each aircraft site (upper panels) and their scatter diagrams (bottom panels) for (25) Park Falls, (26) Worcester, (27) West Branch, (28) Trinidad Head, (29) Beaver Crossing, and (30) Briggsdale. The others are the same as in Fig. S-3.

(31) HIL

(32) AAO

(33) CMA

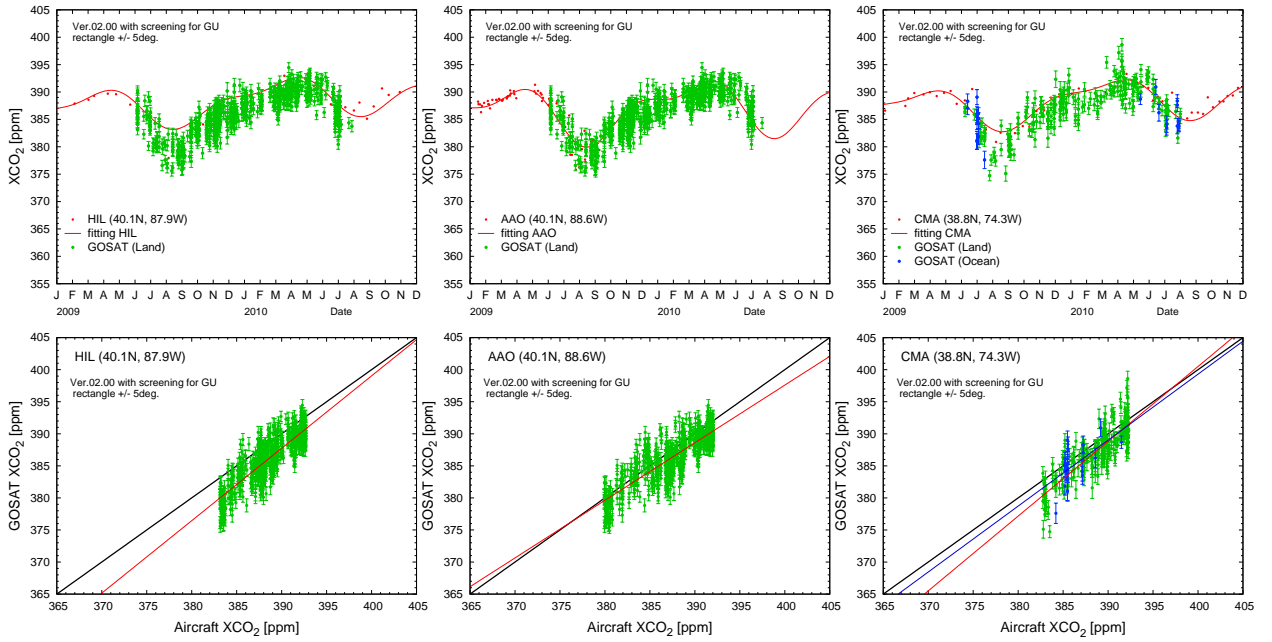

(34) SCA

(35) TGC

(36) RTA

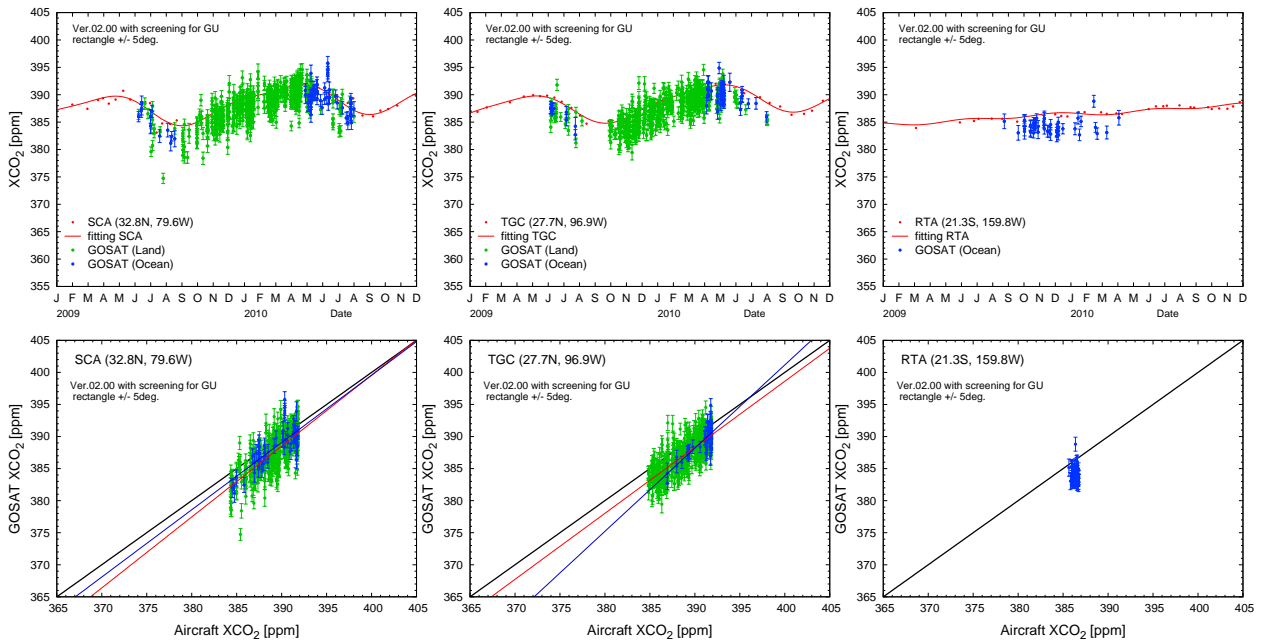

Fig. S- 15: Temporal variations of aircraft-based XCO<sub>2</sub> and GOSAT XCO<sub>2</sub> observed within  $\pm 5^\circ$  latitude/longitude boxes centered at each aircraft site (upper panels) and their scatter diagrams (bottom panels) for (31) Homer, (32) Bondville, (33) Cape May, (34) Charleston, (35) Sinton, and (36) Rarotonga. The others are the same as in Fig. S-3.

(37) SGP

(38) YAK

(39) SUR

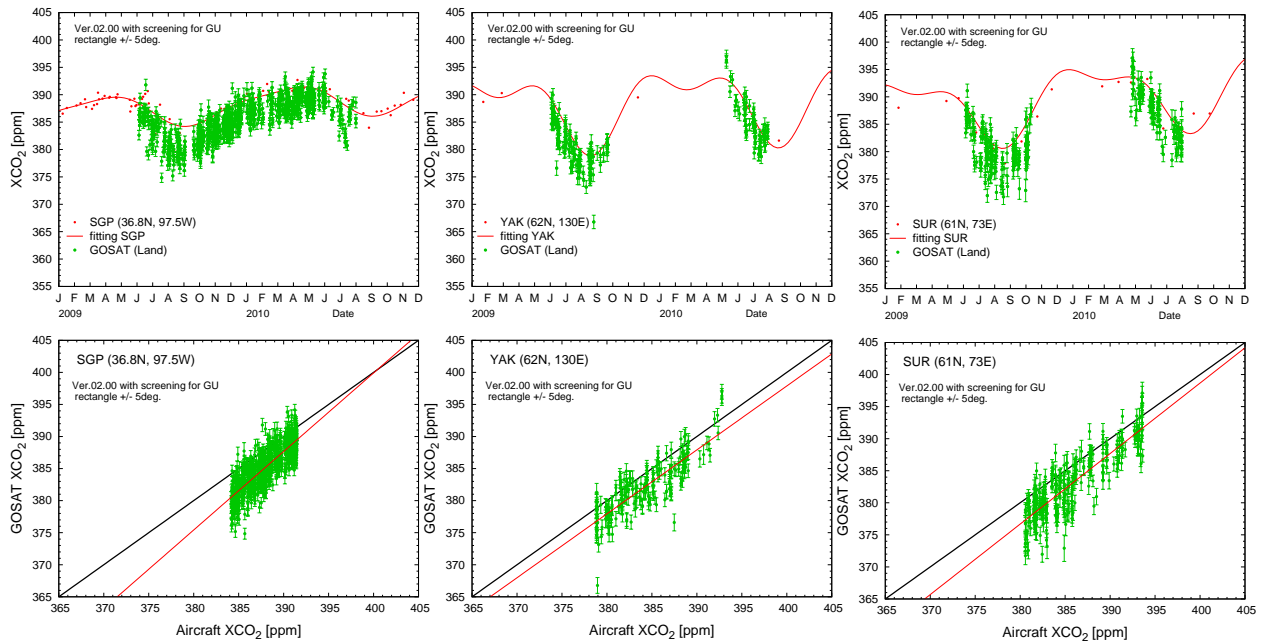

(40) NOV

(41) SGM

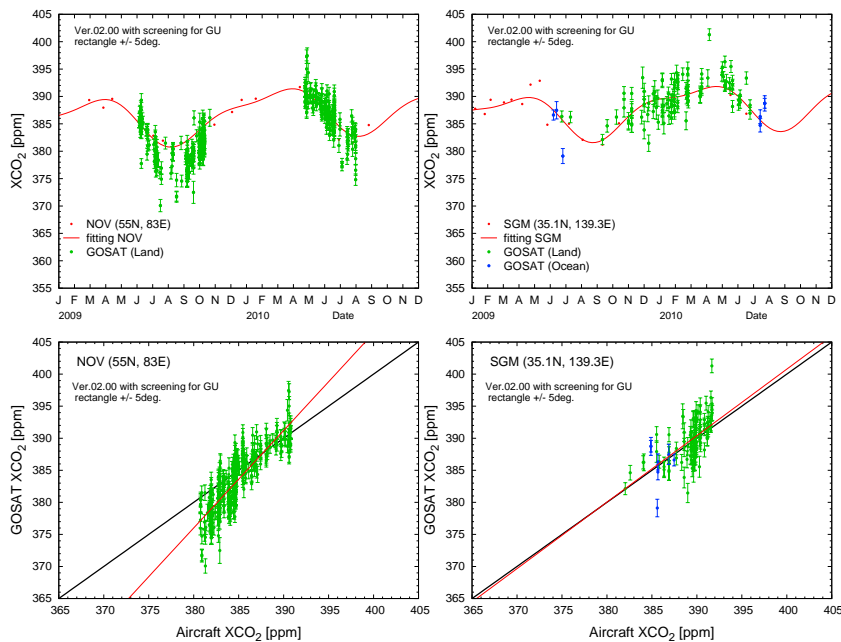

Fig. S- 16: Temporal variations of aircraft-based XCO<sub>2</sub> and GOSAT XCO<sub>2</sub> observed within  $\pm 5^\circ$  latitude/longitude boxes centered at each aircraft site (upper panels) and their scatter diagrams (bottom panels) for (37) the Southern Great Plains, (38) Yakutsk, (39) Surgut, (40) Novosibirsk, and (41) Sagami-bay. The others are the same as in Fig. S-3.

(a)

$\pm 2$  deg.

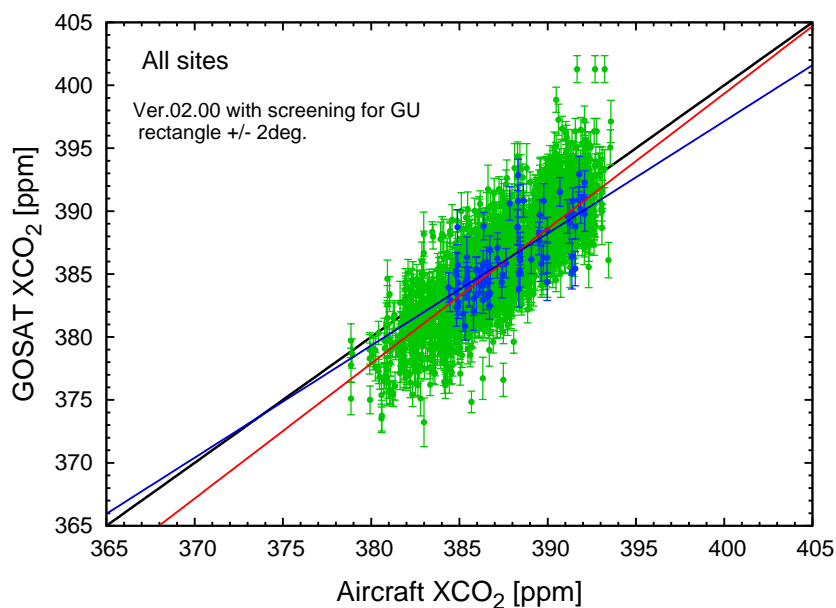

(b)

$\pm 5$  deg.

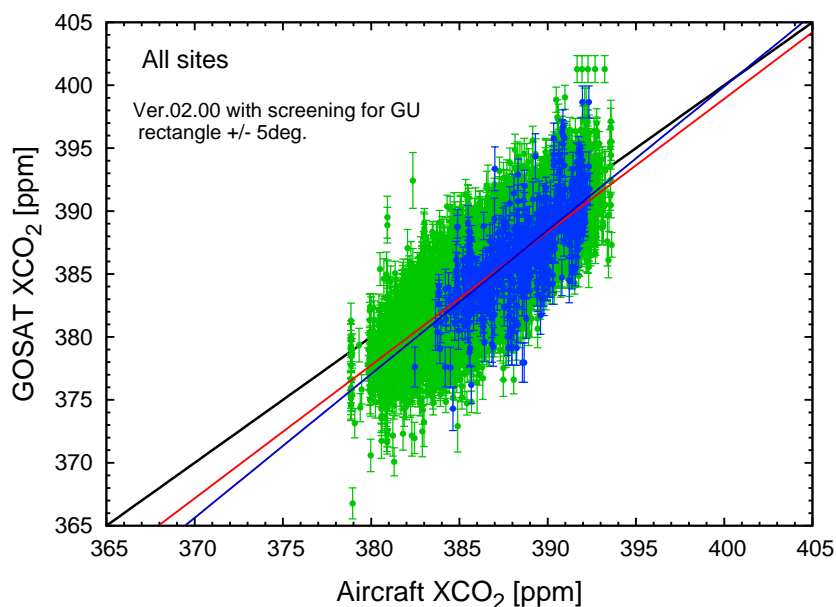

Fig. S- 17: Scatter diagrams between GOSAT XCO<sub>2</sub> observed within (a) $\pm 2^\circ$  and (b) $\pm 5^\circ$  latitude/longitude boxes centered at each aircraft observation site and the aircraft-based XCO<sub>2</sub> (estimate values obtained by a curve fitting method). Green and blue dots indicate XCO<sub>2</sub> obtained over land and ocean regions, respectively. Red and blue lines denote the regression lines with statistical significance at the 95% level over land and ocean regions, respectively. The one-to-one lines are plotted as black lines.
